# Supplementary material
Source: ML conference proceedings conference paper supplement (https://openaccess.thecvf.com/content/ICCV2023/html/Jiang_Personalized_Image_Generation_ICCV_2023_paper.html)
Supplement: Supplementary file 1 [file Jiang_Personalized_Image_Generation_ICCV_2023_supplemental.pdf]

# Supplementary Material

Shuyi Jiang<sup>1</sup>, Daochang Liu<sup>1</sup>, Dingquan Li<sup>2</sup>, Chang Xu<sup>1</sup>

<sup>1</sup>The University of Sydney, <sup>2</sup>Peng Cheng Laboratory

sjia6973@uni.sydney.edu.au, {daochang.liu, c.xu}@sydney.edu.au, lidq01@pcl.ac.cn

## 1. CVD Simulation

Based on the *two-stage theory*, this paper adopted a two-stage model to simulate the CVD gamut proposed by Machado [4]. Take the  $\Delta\lambda$  as the offset distance, spectral curves of L-, M- and S-cone of CVD can be indicated as follows in the first stage:

$$L_a(\lambda) = L(\lambda + \Delta\lambda_L) \quad (1)$$

$$M_a(\lambda) = M(\lambda + \Delta\lambda_M) \quad (2)$$

$$S_a(\lambda) = S(\lambda + \Delta\lambda_S) \quad (3)$$

Then, in the second stage, the corresponding signals will be processed by the transformation matrix  $T_{LMS_2O_{pp}}$  [2] into the opponent-color space as follows:

$$\begin{bmatrix} WS(\lambda) \\ YB(\lambda) \\ RG(\lambda) \end{bmatrix}_{pa} = T_{LMS_2O_{pp}} \begin{bmatrix} L_a(\lambda) \\ M(\lambda) \\ S(\lambda) \end{bmatrix} \quad (4)$$

$$\begin{bmatrix} WS(\lambda) \\ YB(\lambda) \\ RG(\lambda) \end{bmatrix}_{da} = T_{LMS_2O_{pp}} \begin{bmatrix} L(\lambda) \\ M_a(\lambda) \\ S(\lambda) \end{bmatrix} \quad (5)$$

$$\begin{bmatrix} WS(\lambda) \\ YB(\lambda) \\ RG(\lambda) \end{bmatrix}_{ta} = T_{LMS_2O_{pp}} \begin{bmatrix} L(\lambda) \\ M(\lambda) \\ S_a(\lambda) \end{bmatrix} \quad (6)$$

where *pa*, *da*, and *ta* represent the protan, deutan, and tritan deficiency; WS, YB and RG denote the channels of opponent-color space: white-black, yellow-blue, and red-green, respectively. By projecting the spectral power distribution  $\varphi_R(\lambda)$ ,  $\varphi_G(\lambda)$ , and  $\varphi_B(\lambda)$  of the RGB primaries, a transformation from RGB color space to the opponent-color

space can be obtained as:

$$\begin{aligned} WS_R &= \rho_{WS} \int \varphi_R(\lambda) WS(\lambda) d\lambda, \\ WS_G &= \rho_{WS} \int \varphi_G(\lambda) WS(\lambda) d\lambda, \\ WS_B &= \rho_{WS} \int \varphi_B(\lambda) WS(\lambda) d\lambda, \\ YB_R &= \rho_{YB} \int \varphi_R(\lambda) YB(\lambda) d\lambda, \\ YB_G &= \rho_{YB} \int \varphi_G(\lambda) YB(\lambda) d\lambda, \\ YB_B &= \rho_{YB} \int \varphi_B(\lambda) YB(\lambda) d\lambda, \\ RG_R &= \rho_{RG} \int \varphi_R(\lambda) RG(\lambda) d\lambda, \\ RG_G &= \rho_{RG} \int \varphi_G(\lambda) RG(\lambda) d\lambda, \\ RG_B &= \rho_{RG} \int \varphi_B(\lambda) RG(\lambda) d\lambda, \end{aligned} \quad (7)$$

where  $\rho_{WS}$ ,  $\rho_{YB}$ , and  $\rho_{RG}$  are normalization factors, ensuring that

$$\begin{aligned} WS_R + WS_G + WS_B &= 1 \\ YB_R + YB_G + YB_B &= 1 \\ RG_R + RG_G + RG_B &= 1 \end{aligned} \quad (8)$$

Therefore, the transformation matrix can be concluded as a  $3 \times 3$  matrix  $\Gamma_{\delta s}$ , where  $\delta s$  denotes the degree of CVD based on the  $\Delta\lambda$ :

$$\Gamma_{\delta s} = \begin{bmatrix} WS_R & WS_G & WS_B \\ YB_R & YB_G & YB_B \\ RG_R & RG_G & RG_B \end{bmatrix} \quad (9)$$

In summary, the general transformation from RGB color space to opponent-color space for CVD can be defined as a  $3 \times 3$  matrix  $\Gamma_{\delta s}$ . Let  $\Gamma$  be the transformation matrix for normal viewers, then the CVD simulation of an RGB image can be defined as:

$$\begin{bmatrix} R_{sim} \\ G_{sim} \\ B_{sim} \end{bmatrix} = \Gamma^{-1} \Gamma_{\delta s} \begin{bmatrix} R \\ G \\ B \end{bmatrix} \quad (10)$$

## 2. Network Structure

The generator of CVD-GAN can be summarized as Table 1, where convolution layers and modulated layers are adopted from StyleGAN-ada [3]. The structure of the discriminator follows the StyleGAN-ada [3].





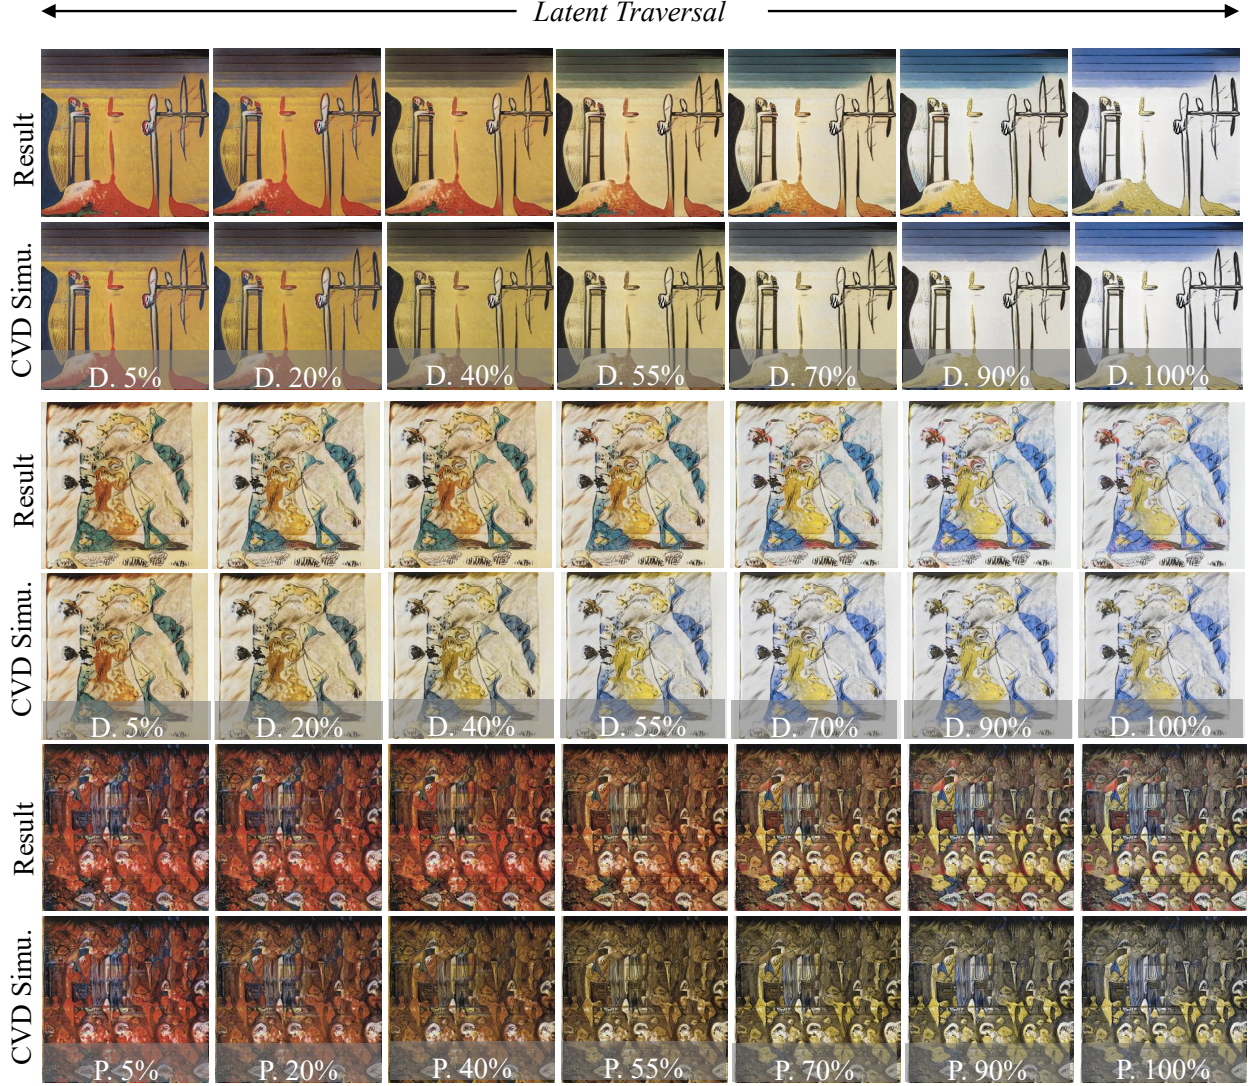

Figure 2. Examples of personalized generation of the symbolic-painting dataset, where "D" denotes deutan- and "P" denotes protan-simulation.

## 5. User Study

As of now, our user study is still ongoing, and we have successfully recruited 17 CVD volunteers, covering a range of ages from 20 to 54 years old. These participants are categorized into three levels: mild, medium, and severe, based on the Hue 100 test. Each volunteer rates 18 randomly selected images generated by three different methods: *StyleGAN* (black box), *StyleGAN + Zhu* (green box), and *our CVD-GAN* (blue box) using a Likert scale from 1 to 5. The ratings are based on the clearness and comfort level of the images, where a higher score indicates better results. The current outcomes are as Fig. 5.

According to the p-values of the t-test, ours achieves

higher marks with statistical significance.

## References

- [1] Jia-Bin Huang, Chu-Song Chen, Tzu-Cheng Jen, and Sheng-Jyh Wang. Image recolorization for the colorblind. In *IEEE International Conference on Acoustics, Speech and Signal Processing*, pages 1161–1164, 2009. 6
- [2] Carl R Ingling Jr and Brian Huong-Peng Tsou. Orthogonal combination of the three visual channels. *Vision Research*, 17(9):1075–1082, 1977. 1
- [3] Tero Karras, Miika Aittala, Janne Hellsten, Samuli Laine, Jaakko Lehtinen, and Timo Aila. Training generative adversarial networks with limited data. In *Advances in Neural Infor-*



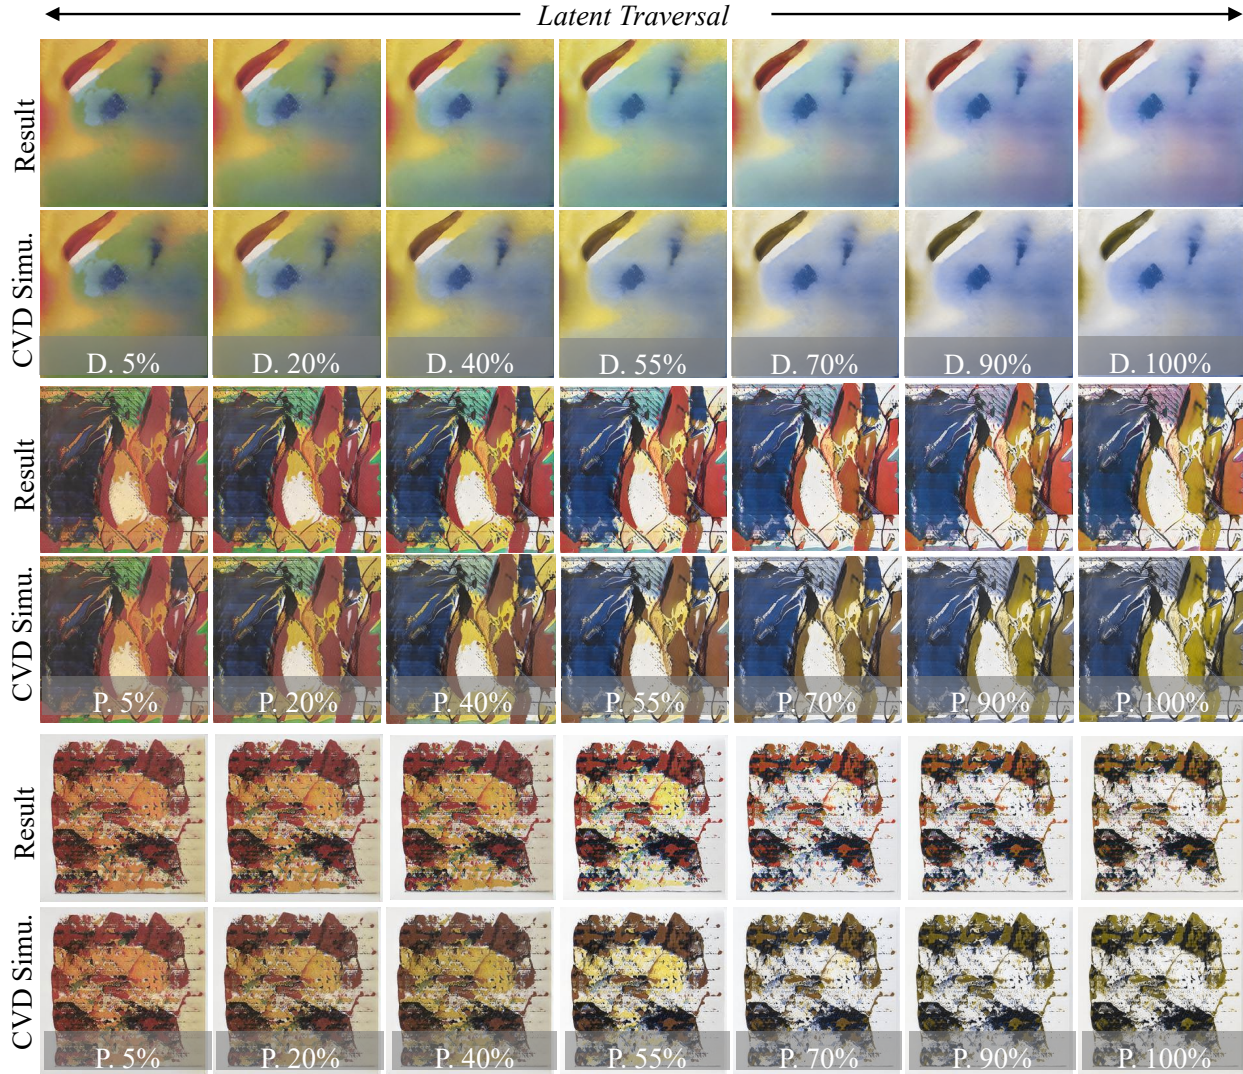

Figure 3. Examples of personalized generation of the abstract-art dataset.

- ation Processing Systems, volume 33, pages 12104–12114, 2020. 1, 6
- [4] Gustavo M. Machado, Manuel M. Oliveira, and Leandro A. F. Fernandes. A physiologically-based model for simulation of color vision deficiency. *IEEE Transactions on Visualization and Computer Graphics*, 15(6):1291–1298, 2009. 1
- [5] Maria-Elena Nilsback and Andrew Zisserman. Automated flower classification over a large number of classes. In *Indian Conference on Computer Vision, Graphics & Image Processing*, pages 722–729, 2008. 6
- [6] George Ogden. Abstract art. [www.kaggle.com/datasets/goprogram/abstract-art](https://www.kaggle.com/datasets/goprogram/abstract-art), Accessed February 18, 2023 [Online]. 6
- [7] Babak Saleh and Ahmed Elgammal. Large-scale classification of fine-art paintings: Learning the right metric on the right feature. *arXiv preprint arXiv:1505.00855*, 2015. 6
- [8] Zhenyang Zhu, Masahiro Toyoura, Kentaro Go, Kenji Kashiwagi, Issei Fujishiro, Tien-Tsin Wong, and Xiaoyang Mao. Personalized image recoloring for color vision deficiency compensation. *IEEE Transactions on Multimedia*, 24:1721–1734, 2022. 6



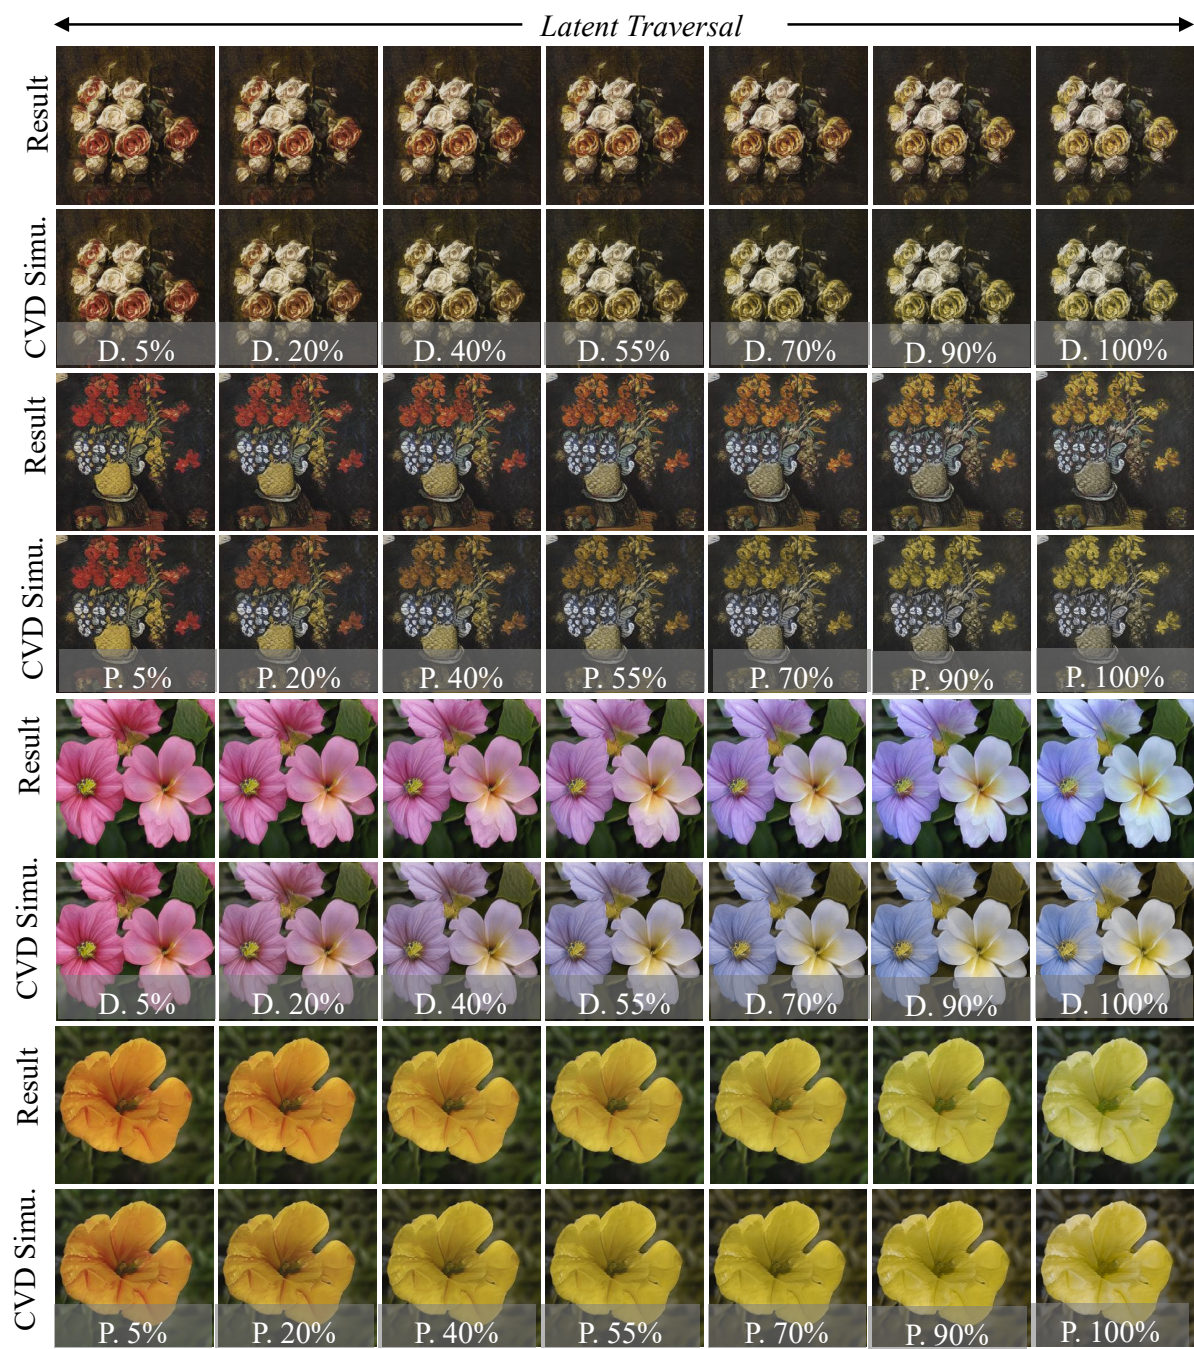

Figure 4. Examples of personalized generation of the still-life and flower datasets.

| Dataset               | Degree | StyleGAN [3] | StyleGAN with         |                         | CVD-GAN (Ours) |
|-----------------------|--------|--------------|-----------------------|-------------------------|----------------|
|                       |        |              | Zhu <i>et al.</i> [8] | Huang <i>et al.</i> [1] |                |
| Abstract Art [6]      | 0%     | 14.35        | -                     | -                       | 17.73          |
|                       | 40%    | -            | 16.68                 | -                       | 18.27          |
|                       | 100%   | -            | 23.44                 | 16.86                   | 19.58          |
| Still-Life [7]        | 0%     | 18.96        | -                     | -                       | 22.10          |
|                       | 40%    | -            | 23.42                 | -                       | 24.09          |
|                       | 100%   | -            | 26.36                 | 21.91                   | 25.36          |
| Symbolic-Painting [7] | 0%     | 28.20        | -                     | -                       | 31.66          |
|                       | 40%    | -            | 29.26                 | -                       | 28.37          |
|                       | 100%   | -            | 30.55                 | 28.76                   | 28.01          |
| Flowers [5]           | 0%     | 8.23         | -                     | -                       | 18.93          |
|                       | 40%    | -            | 12.48                 | -                       | 19.15          |
|                       | 100%   | -            | 18.73                 | 20.64                   | 20.13          |

Table 2. FID of images generated by StyleGAN, post-processing recolor methods, and proposed CVD-GAN under various datasets, where the lower value indicates better image quality.

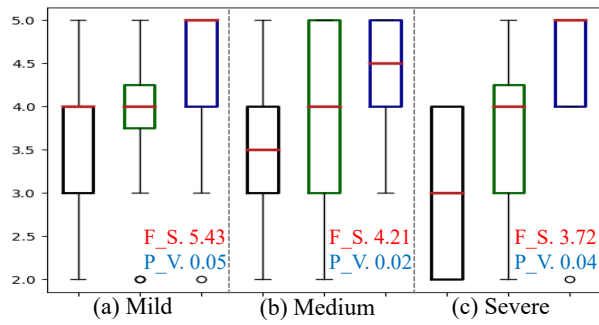

Figure 5. Result of the user study. (a), (b), and (c) showcase the ranking of populations with mild, medium, and severe CVD degrees, respectively. The notation F.S. indicates the F statistics and P\_V represents the statistical significance of the collected preference results.
